# Supplementary material
Source: PubMed Central journal article supplement (PMC7168560)

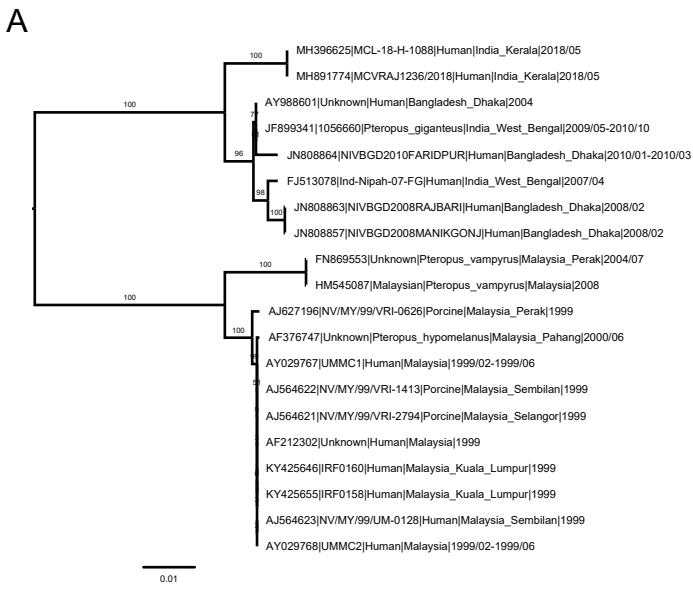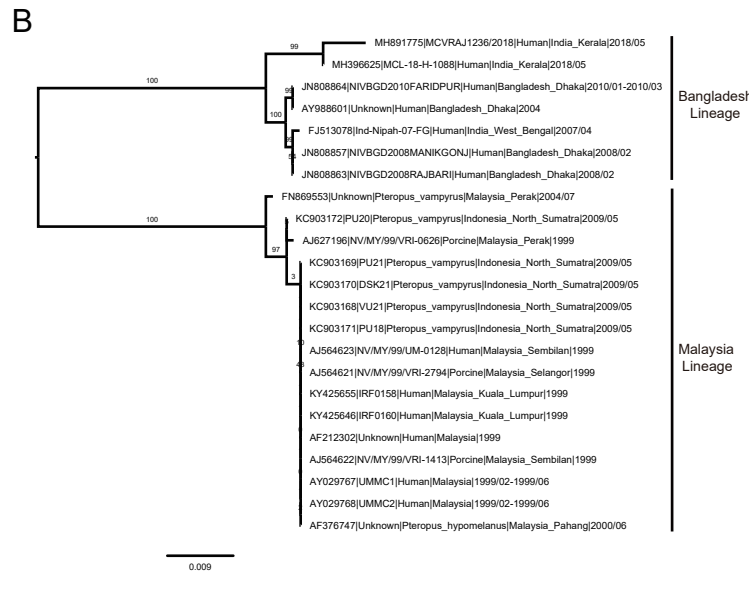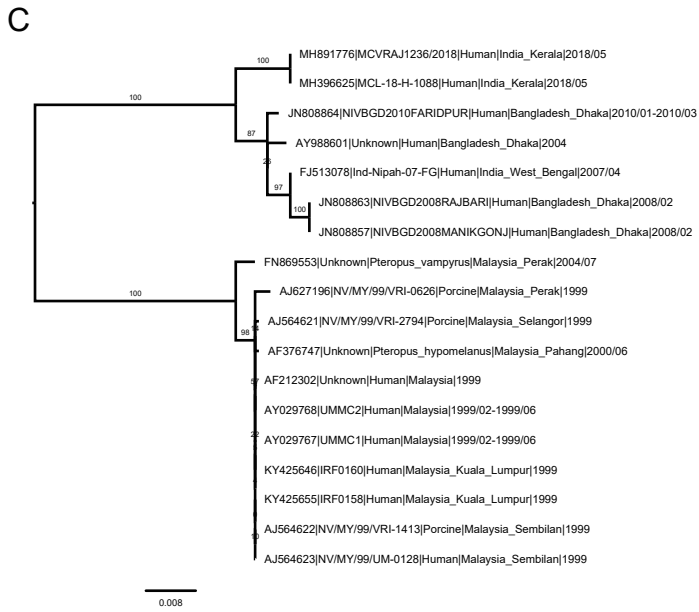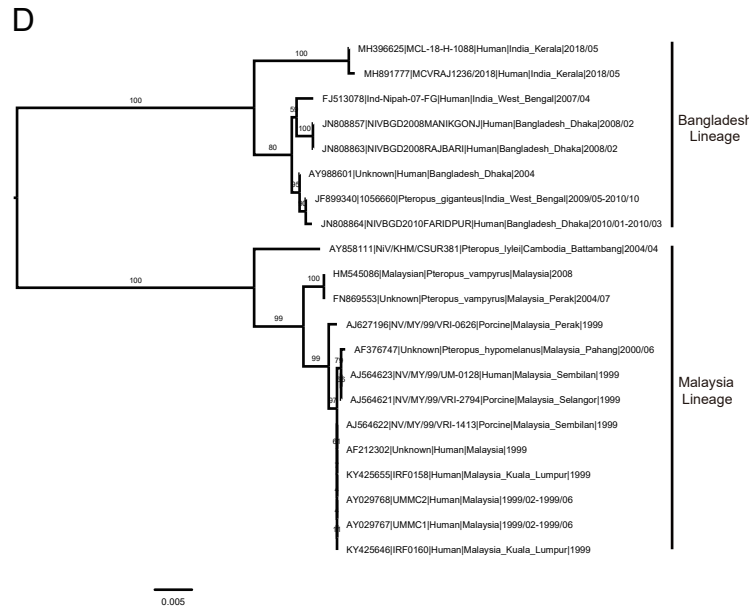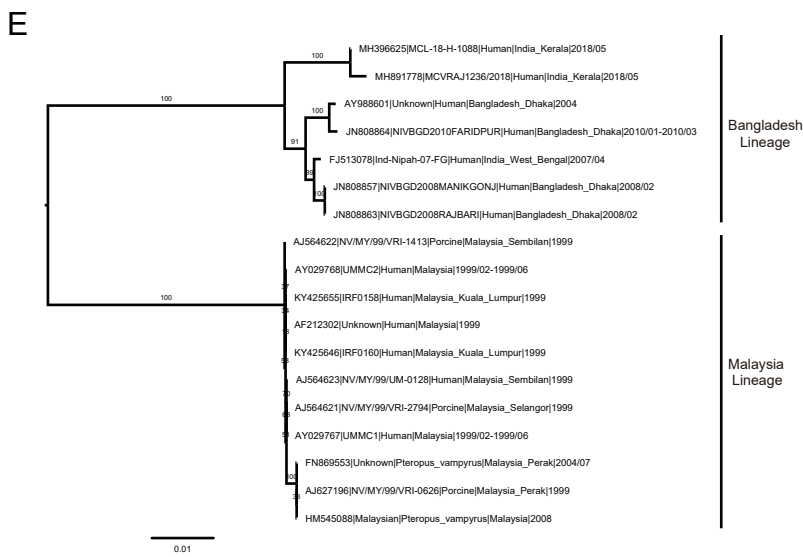

Supplement: TBED-67-121-s001.pdf [file TBED-67-121-s001.pdf]

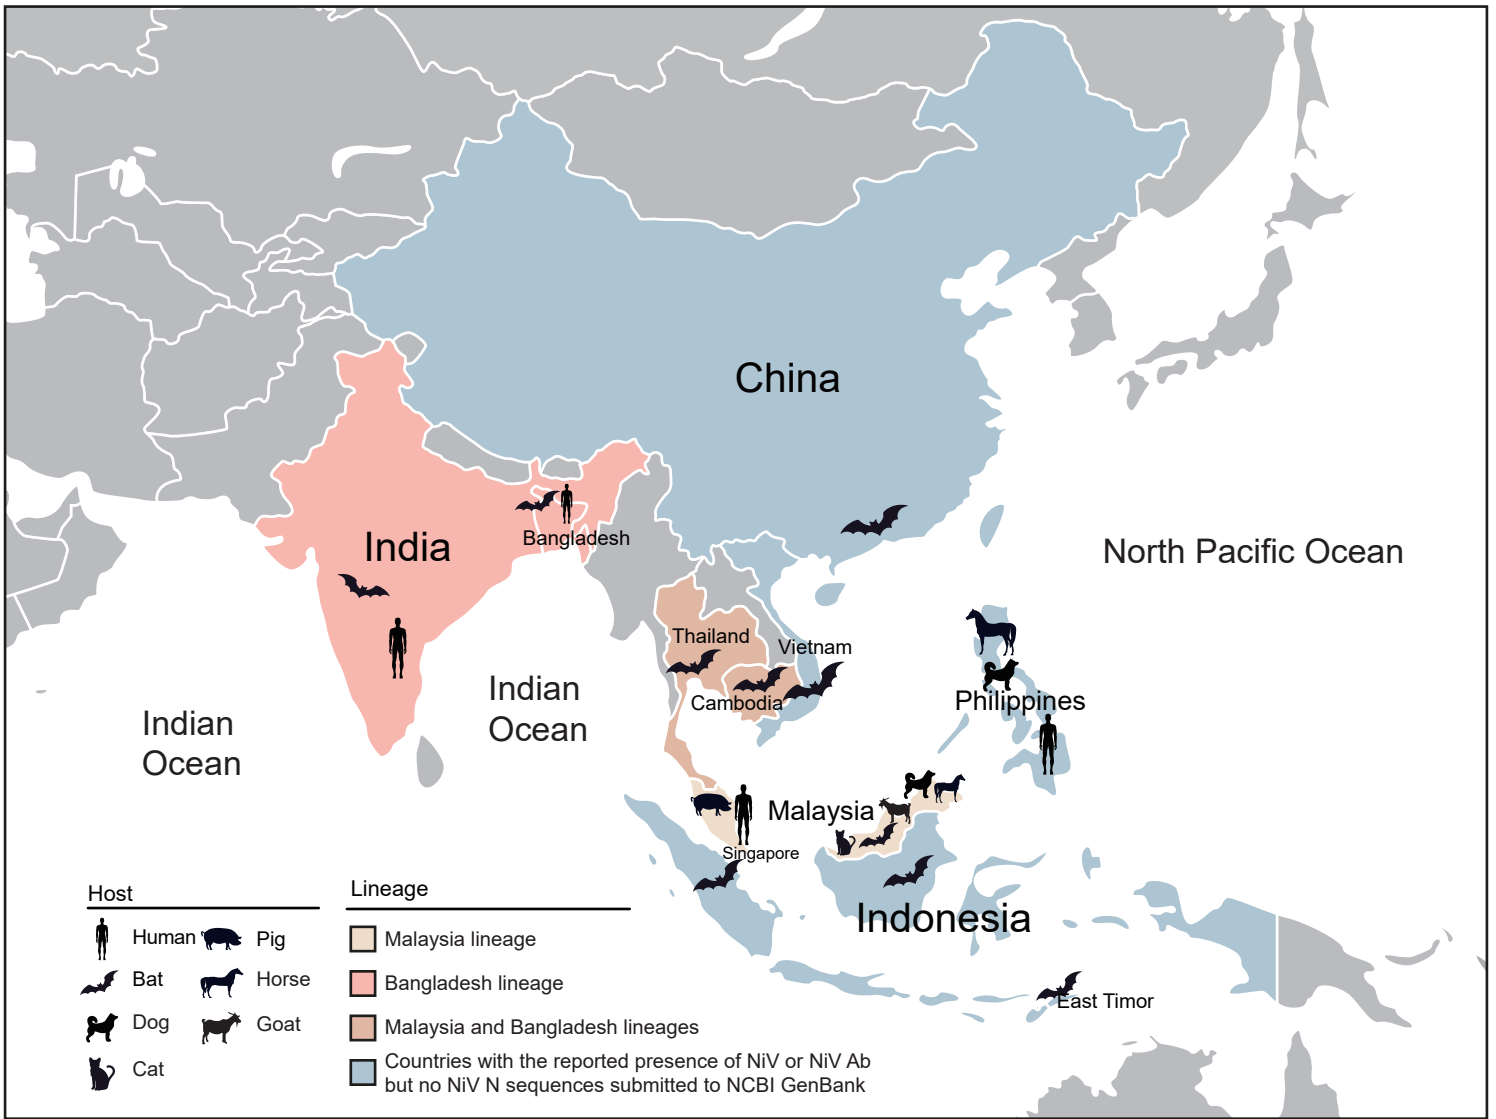

Supplement: TBED-67-121-s002.pdf [file TBED-67-121-s002.pdf]
